# Supplementary material for: Glycomic profiling of targeted serum haptoglobin for gastric cancer using nano LC/MS and LC/MS/MS
Source: Royal Society of Chemistry journal article supplement (doi:10.1039/c6mb00559d), 2016-09-28
Supplement: c6mb00559d1.pdf [file c6mb00559d1.pdf]

1 **Supplementary Information**

2 **Glycomic profiling of targeted serum haptoglobin for gastric**  
3 **cancer using nano LC/MS and LC/MS/MS**

4 Sung Hyeon Lee<sup>a</sup>, Seunghyup Jeong<sup>b,c</sup>, Jua Lee<sup>b,c</sup>, In Seok Yeo<sup>d</sup>, Myung Jin Oh<sup>b,c</sup>, Unyong  
5 Kim<sup>b,c</sup>, Sumin Kim<sup>b,c</sup>, Su Hee Kim<sup>a</sup>, Seung-Yeol Park<sup>e</sup>, Jae-Han Kim<sup>f</sup>, Se Hoon Park<sup>g</sup>, Jung  
6 Hoe Kim<sup>d\*</sup>, and Hyun Joo An<sup>b,c\*</sup>

7 *a. GLYCAN Co., Ltd., Seongnam, Korea*

8 *b. Asia-pacific Glycomics Reference Site, Daejeon, Korea*

9 *c. Graduate School of Analytical Science and Technology, Chungnam National University, Daejeon, Korea*

10 *d. Department of Biological Sciences, Korea Advanced Institute of Science and Technology, Daejeon, Korea*

11 *e. Division of Rheumatology, Immunology, and Allergy, Brigham and Women's Hospital, and the Department of*  
12 *Medicine, Harvard Medical School, Boston, Massachusetts 02115, USA*

13 *f. Department of Food and Nutrition, Chungnam National University, Daejeon, Korea*

14 *g. Division of Hematology-Oncology, Department of Medicine, Sungkyunkwan University Samsung Medical*  
15 *Center, Seoul, Korea*

16

17 **Corresponding authors:** Jung Hoe Kim, E6-3 Department of Biological Sciences, Korea  
18 Advanced Institute of Science and Technology, Daehak-ro, Yuseong-gu, Daejeon 305-701,  
19 Republic of Korea. E-mail: kimjh@kaist.ac.kr. Fax: +82-42-350-2690. Hyun Joo An, 455  
20 College of Engineering II, Chungnam National University, 99 Daehak-ro, Yuseong-gu,  
21 Daejeon 305-764, Republic of Korea. E-mail: hjan@cnu.ac.kr. Fax: 82-42-821-8551.

22

23 \* Jung Hoe Kim and Hyun Joo An contributed equally to this paper as co-corresponding  
24 authors.

## 1 Supplemental Tables and Figures

2 **Suppl Table 1.** Clinical and histopathological information of serum samples used in this  
3 study

| <b>Characteristic</b>               | <b>Number of samples (%)</b> |
|-------------------------------------|------------------------------|
| <i>General Classification</i>       |                              |
| Healthy Control                     | 30                           |
| Gastric Cancer                      | 30                           |
| <i>Age in Years (median, range)</i> |                              |
| Healthy Control                     | 49.4, 33-77                  |
| Gastric Cancer                      | 50.7, 31-76                  |
| <i>Patient Sex</i>                  |                              |
| Male                                | 15 (50%)                     |
| Female                              | 15 (50%)                     |
| <i>Pathological Stage</i>           |                              |
| IV                                  | 30 (100%)                    |
| <i>Cancer type</i>                  |                              |
| Adenocarcinoma                      | 30 (100%)                    |

4

5

6

7

8

9

10

11

1

2 **Suppl Table 2.** Protein identification for lectin-binding target spots using LC-MS/MS

3 analysis. Identified proteins showed more than 60 mowse score and 9% coverage were listed.

| Spot label     | Protein identified by LC-MS/MS | Accession number (NCBI BLAST) | Mowse score | Peptides matched | Coverage(%) |
|----------------|--------------------------------|-------------------------------|-------------|------------------|-------------|
| Normal         | haptoglobin                    | gi 176792                     | 115         | 15               | 15          |
|                | haptoglobin                    | gi 466455                     | 106         | 15               | 15          |
|                | haptoglobin-related protein    | gi 210148826                  | 102         | 15               | 11          |
| Gastric Cancer | haptoglobin                    | gi 176792                     | 145         | 33               | 16          |
|                | haptoglobin                    | gi 466455                     | 116         | 32               | 12          |
|                | haptoglobin-related protein    | gi 210148826                  | 111         | 32               | 9           |

The spots listed correspond to lanes in rectangular inset in Supple Fig. 1A.

4

5

6

7

8

9

10

11

12

13

1

- 2 **Suppl Table 3.** Relative abundance of 35 distinct N-glycans of haptoglobin found in healthy  
3 controls, gastric cancer patients as well as commercial standard (C.standard) sera. Criteria:  
4 100% frequency in C.standard and top 99% in all groups

| Glycan Mass/Da | Composition |        |     |       | C.standard    |            | Healthy controls |            | Cancer patients |            |
|----------------|-------------|--------|-----|-------|---------------|------------|------------------|------------|-----------------|------------|
|                | Hex         | HexNAc | Fuc | NeuAc | <u>Avg(%)</u> | <u>Ste</u> | <u>Avg(%)</u>    | <u>Ste</u> | <u>Avg(%)</u>   | <u>Ste</u> |
| 2222.78296     | 5           | 4      | 0   | 2     | 27.544        | 1.547      | 29.726           | 1.081      | 29.789          | 1.043      |
| 2879.01056     | 6           | 5      | 0   | 3     | 21.935        | 0.464      | 24.911           | 1.314      | 20.980          | 1.101      |
| 2587.91516     | 6           | 5      | 0   | 2     | 13.001        | 0.234      | 11.506           | 0.555      | 9.365           | 0.596      |
| 1931.68756     | 5           | 4      | 0   | 1     | 12.389        | 0.270      | 11.738           | 0.295      | 10.989          | 0.260      |
| 3025.06846     | 6           | 5      | 1   | 3     | 6.251         | 0.149      | 5.966            | 0.508      | 9.850           | 0.920      |
| 2296.81976     | 6           | 5      | 0   | 1     | 2.869         | 0.085      | 2.454            | 0.116      | 2.079           | 0.122      |
| 2733.97306     | 6           | 5      | 1   | 2     | 2.754         | 0.042      | 1.864            | 0.187      | 3.304           | 0.334      |
| 1640.59216     | 5           | 4      | 0   | 0     | 2.219         | 0.038      | 1.266            | 0.110      | 1.257           | 0.118      |
| 2953.04736     | 7           | 6      | 0   | 2     | 1.897         | 0.042      | 1.928            | 0.112      | 1.676           | 0.107      |
| 2368.84086     | 5           | 4      | 1   | 2     | 1.495         | 0.048      | 1.455            | 0.078      | 1.876           | 0.166      |
| 3244.14276     | 7           | 6      | 0   | 3     | 1.080         | 0.091      | 1.221            | 0.111      | 1.069           | 0.099      |
| 2077.74546     | 5           | 4      | 1   | 1     | 0.819         | 0.031      | 0.673            | 0.037      | 0.950           | 0.082      |
| 2661.95196     | 7           | 6      | 0   | 1     | 0.745         | 0.029      | 0.591            | 0.041      | 0.504           | 0.040      |
| 3390.20066     | 7           | 6      | 1   | 3     | 0.385         | 0.016      | 0.318            | 0.043      | 0.803           | 0.119      |
| 2005.72436     | 6           | 5      | 0   | 0     | 0.355         | 0.009      | 0.183            | 0.014      | 0.168           | 0.013      |
| 2442.87766     | 6           | 5      | 1   | 1     | 0.327         | 0.024      | 0.219            | 0.020      | 0.325           | 0.032      |
| 2280.82486     | 5           | 5      | 1   | 1     | 0.298         | 0.011      | 0.415            | 0.025      | 0.311           | 0.026      |
| 3099.10526     | 7           | 6      | 1   | 2     | 0.285         | 0.017      | 0.236            | 0.024      | 0.467           | 0.056      |
| 2093.74036     | 6           | 4      | 0   | 1     | 0.272         | 0.011      | 0.273            | 0.014      | 0.319           | 0.020      |
| 1566.55536     | 4           | 3      | 0   | 1     | 0.215         | 0.012      | 0.195            | 0.011      | 0.239           | 0.018      |
| 3171.12636     | 6           | 5      | 2   | 3     | 0.181         | 0.024      | 0.179            | 0.034      | 0.563           | 0.129      |
| 1769.63476     | 4           | 4      | 0   | 1     | 0.155         | 0.005      | 0.136            | 0.006      | 0.131           | 0.010      |
| 3042.08376     | 7           | 5      | 2   | 2     | 0.134         | 0.004      | 0.128            | 0.014      | 0.220           | 0.020      |
| 2134.76696     | 5           | 5      | 0   | 1     | 0.127         | 0.003      | 0.095            | 0.005      | 0.118           | 0.013      |
| 2370.85656     | 7           | 6      | 0   | 0     | 0.122         | 0.040      | 0.055            | 0.010      | 0.055           | 0.021      |
| 1989.72946     | 5           | 5      | 1   | 0     | 0.107         | 0.005      | 0.107            | 0.008      | 0.087           | 0.008      |
| 2425.86236     | 5           | 5      | 0   | 2     | 0.105         | 0.006      | 0.076            | 0.005      | 0.096           | 0.012      |
| 2571.92026     | 5           | 5      | 1   | 2     | 0.103         | 0.004      | 0.121            | 0.008      | 0.089           | 0.008      |
| 1624.59726     | 4           | 4      | 1   | 0     | 0.103         | 0.004      | 0.148            | 0.010      | 0.136           | 0.014      |
| 1275.45996     | 4           | 3      | 0   | 0     | 0.101         | 0.004      | 0.074            | 0.005      | 0.092           | 0.008      |
| 1786.65006     | 5           | 4      | 1   | 0     | 0.099         | 0.008      | 0.080            | 0.007      | 0.097           | 0.010      |
| 1462.54446     | 3           | 4      | 1   | 0     | 0.095         | 0.006      | 0.125            | 0.011      | 0.157           | 0.019      |
| 1827.67666     | 4           | 5      | 1   | 0     | 0.092         | 0.007      | 0.109            | 0.012      | 0.106           | 0.011      |
| 2808.00986     | 7           | 6      | 1   | 1     | 0.090         | 0.005      | 0.063            | 0.007      | 0.110           | 0.014      |
| 1234.43336     | 5           | 2      | 0   | 0     | 0.079         | 0.003      | 0.093            | 0.007      | 0.072           | 0.007      |

5

6

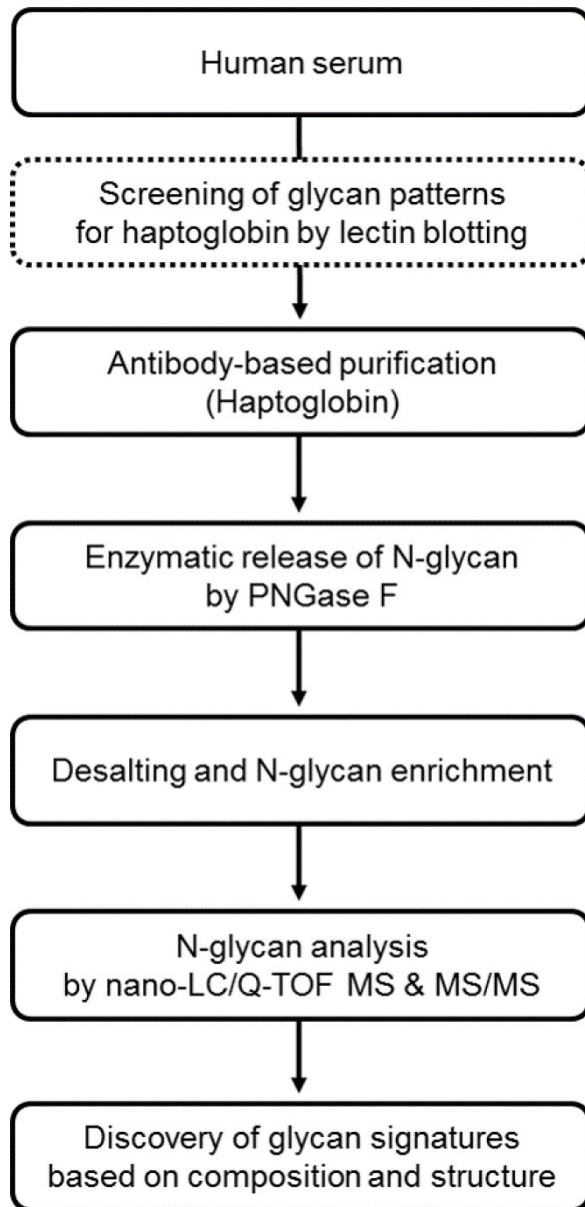

1

2 **Suppl Figure 1.** The experimental workflow for N-glycan analysis of targeted serum  
3 haptoglobin based on immunoaffinity purification followed by chip-based nano-LC/Q-TOF  
4 MS and MS/MS

5

6

7

8

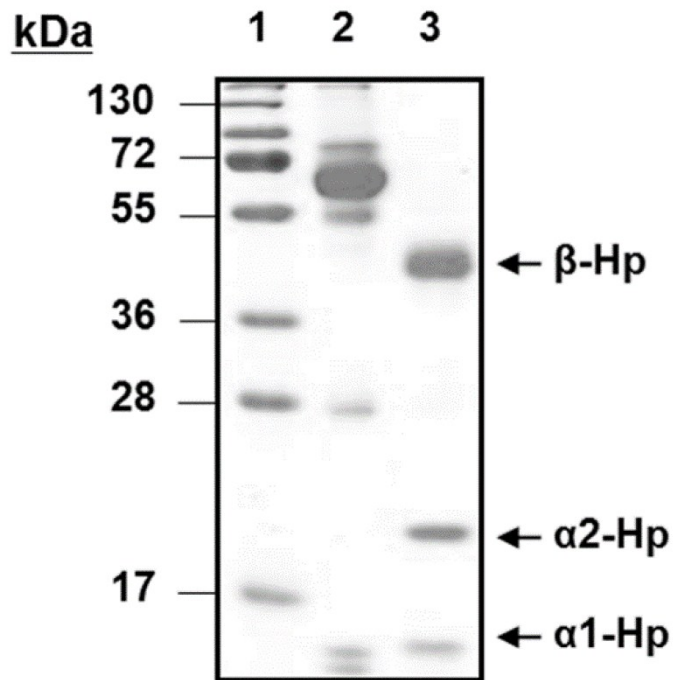

1

2 **Suppl Fig 2.** Purification of haptoglobin from commercial serum. Haptoglobin was purified  
3 from 450  $\mu$ L serum by anti-haptoglobin affinity chromatography. The purified haptoglobin  
4 was subjected to 12.5% SDS-PAGE, and bands were stained by Coomassie Brilliant Blue.  
5 Lane 1: size marker. Lane 2: 1:100 diluted serum. Lane 3: purified haptoglobin.

6

7

8

9

10

11

12

13

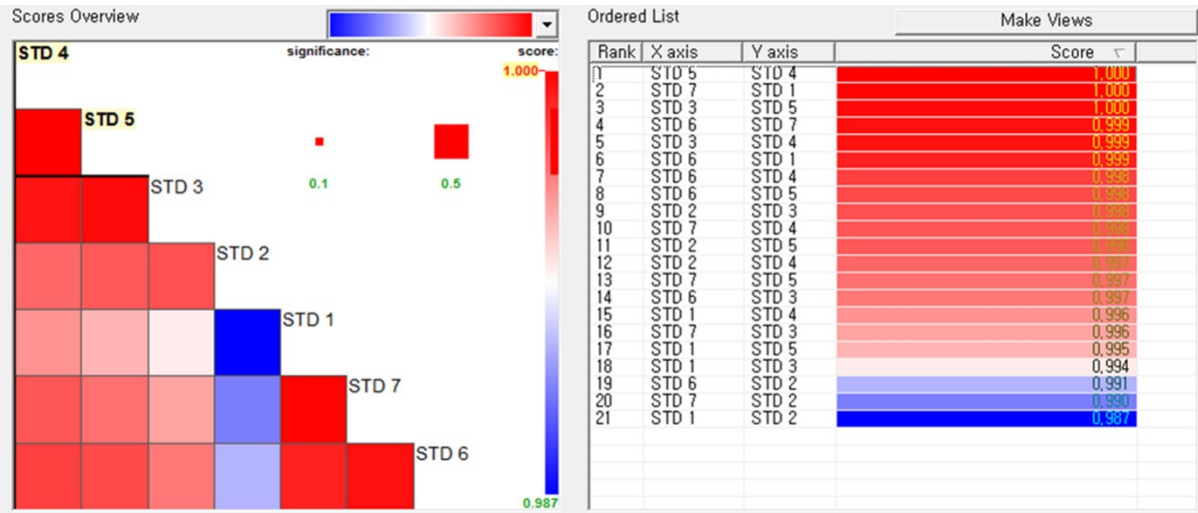

1  
 2 **Suppl Fig 3.** Pearson correlation coefficient ( $R$ ) based on haptoglobin glycan composition  
 3 profiles derived from 7 commercial sera samples.

4

5

6

7

8

9

10

11

12

13

A.

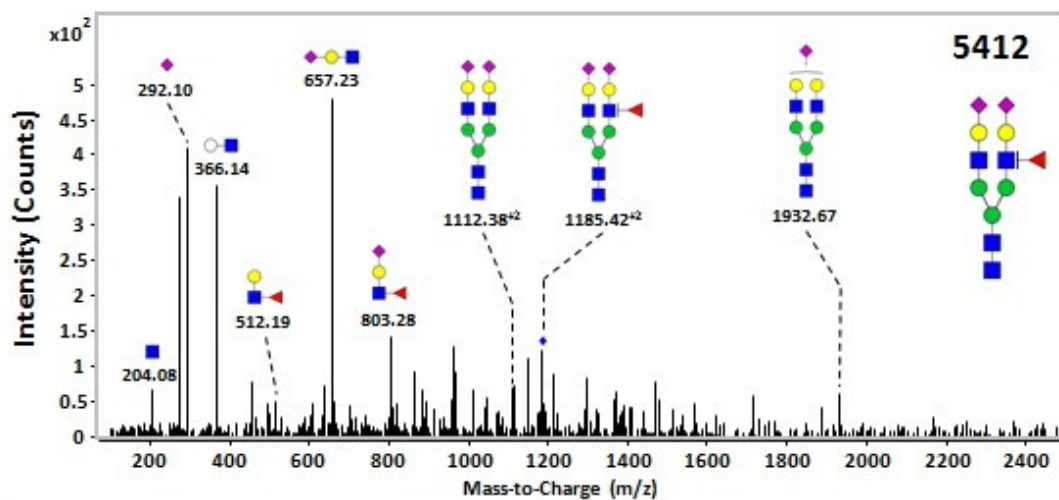

B.

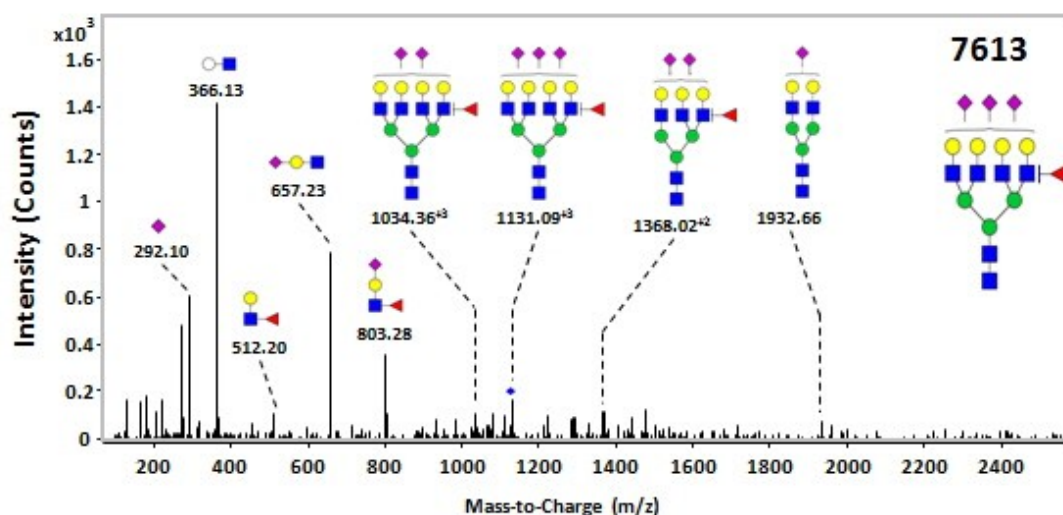

1

2 **Suppl Fig 4.** Identification of fucose location of serum haptoglobin. Targeted CID MS/MS  
3 spectrums of bi-sialylated, mono-fucosylated, bi-antennary N-glycans (A) and  
4 mono-fucosylated, tetra-antennary (B) glycans taken from the major isomer during LC  
5 elution of the composition Hex<sub>5</sub>HexNAc<sub>4</sub>Fuc<sub>1</sub>NeuAc<sub>2</sub> and Hex<sub>7</sub>HexNAc<sub>6</sub>Fuc<sub>1</sub>NeuAc<sub>3</sub>,  
6 respectively.

7

8



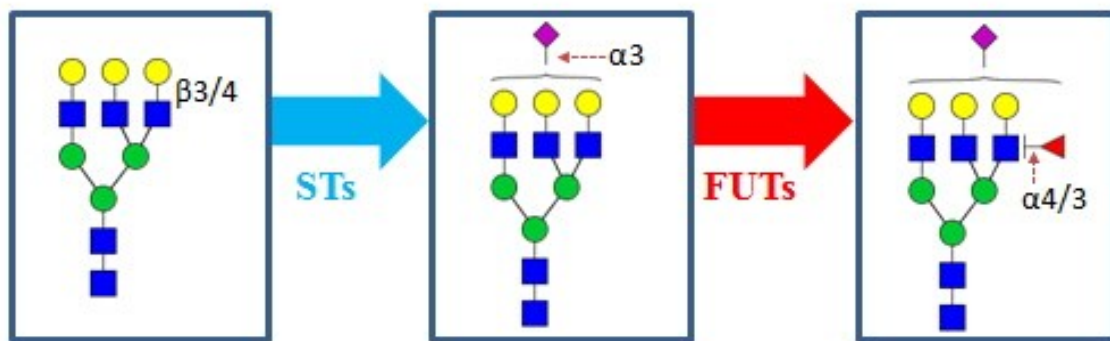

1

2 **Suppl Fig 5.** A representative processes related to *in vivo* synthesis pathway of SLe<sup>a</sup> or SLe<sup>x</sup>.

3 Red and blue arrows indicate fucosylation and sialylation, respectively.

4

5

6

7

8

9

10

11

12

13

14

15
